# Supplementary material for: Characterization of the vaginal microbiota of women with premature ovarian insufficiency
Source: Research Square preprint supplement (doi:10.21203/rs.3.rs-439533/v1), 2021-05-05
Supplement: Supplementary file 1 [file 768ab4435102953dea72582d.xlsx]

## Sheet: Sheet1
Species	Lactobacillus crispatus	Lactobacillus iners	Lactobacillus sp. L-YJ	Miscellaneous
V_CON01	1.13313	0	54.2244	44.6425
V_CON02	0.143667	0.018739	3.62603	96.2116
V_CON03	91.0787	1.65794	0.038669	7.22468
V_CON04	0.156257	98.0066	0	1.83711
V_CON05	0.026204	0.195074	0.119373	99.6593
V_CON06	1.3699	0.095211	0	98.5349
V_CON07	96.9273	1.48745	0.016816	1.56847
V_CON08	0.054129	99.368	0.013167	0.564699
V_CON09	0.078922	37.538	38.2291	24.154
V_CON10	0.079331	0.043407	3.77793	96.0993
V_CON11	1.10713	0.115098	58.91	39.8677
V_CON12	93.8913	0.229923	0.055602	5.82322
V_CON13	0.065708	83.272	0.033618	16.6287
V_CON14	96.2397	0.136606	0	3.62366
V_CON15	0.061165	1.31877	0.029836	98.5902
V_CON16	0.070438	99.4144	0.013811	0.501354
V_CON17	0.358494	0.019916	0.012256	99.6093
V_CON18	98.7346	0.060258	0	1.20516
V_CON19	0.043691	97.8743	0.867096	1.21494
V_CON20	1.4364	0.773446	52.8243	44.9659
V_CON21	0.562263	0.16572	62.9054	36.3666
V_CON22	0.08643	82.3852	0.819546	16.7089
V_CON23	0.065069	37.6435	42.21	20.0814
V_CON24	0.035344	96.1179	0.038171	3.80863
V_CON25	97.9524	0.560248	0.031283	1.45608
V_CON26	0.040668	99.6762	0.021087	0.262084
V_POI01	0.088701	0.104993	0	99.8063
V_POI02	0.719064	0.20979	0	99.0711
V_POI03	0.065894	3.04011	0.014976	96.879
V_POI04	95.6861	1.64611	0	2.66778
V_POI05	0.078592	95.8462	0.148452	3.92671
V_POI06	3.18587	92.9501	0.14564	3.71837
V_POI07	0.355408	2.67045	0	96.9741
V_POI08	99.446	0.016001	0	0.538021
V_POI09	1.31503	97.89	0	0.794953
V_POI10	99.0758	0.17974	0.113836	0.630589
V_POI11	0.039666	0.126625	0.015256	99.8185
V_POI12	98.1173	0.743528	0.073158	1.06602
V_POI13	0.706067	75.8168	1.40137	22.0757
V_POI14	27.7697	0.085632	64.4486	7.69615
V_POI15	0.178731	0.056173	0.063833	99.7013
V_POI16	0.078639	0.022224	0	99.8991
V_POI17	0.717603	88.9408	0	10.3416
V_POI18	96.2634	0.293624	0.018456	3.4245
V_POI19	0.420037	98.9329	0.011352	0.635732
V_POI20	0.096351	0.127665	0	99.776
V_POI22	0.082688	80.2678	0.085868	19.5637
V_POI23	86.142	10.1023	0.022305	3.73344
V_POI24	0.032734	0.091312	0	99.876
V_POI25	0.131929	86.6922	0.027663	13.1482
V_POI26	0.753105	0.035862	0.029342	99.1817
V_POI27	27.8495	0.042265	61.9904	10.1179
V_POI28	99.2537	0.140668	0.025172	0.58044
V_POI29	94.72	2.72067	0.024558	2.53473
V_POI30	94.8717	2.96464	0.049385	2.1143
